# Supplementary material for: Natural Allelic Variations of Bch10G006400 Controlling Seed Size in Chieh-qua (Benincasa hispida Cogn. var. Chieh-qua How)
Source: MDPI journal article supplement (doi:10.3390/ijms25084236), 2024-04-11
Supplement: s1 [file s1]

**Title: Natural allelic variations of *Bch10G006400* controlling seed size in chieh-qua (*Benincasa hispida* Cogn. var. *Chieh-qua* How).**

# Supplementary Information

**Table S1.** Primer use for linkage analysis of seed size.

| Primer Name | Position   | Type  | Forward primer (5'→3')     | Reverse primer (5'→3')     |
|-------------|------------|-------|----------------------------|----------------------------|
| SS_1        | 15,351,120 | Indel | GAGAGTAAAAAGTTCTAAATATCCG  | CTATCTCCACTGTACTAGAAAAATC  |
| SS_2        | 15,867,600 | Indel | ACATCACACTACACGTTCTGATTGG  | TCAAACTCACCATCAGCTCTACAA   |
| SS_3        | 15,889,360 | Indel | CACTGTTTATAGGC AAAATGTCAAG | ACAACCTATAAGTTTAACCCCATGT  |
| SS_4        | 15,938,160 | Indel | GTCTATGTAATCCACCTCTCACTTG  | AAGGAGTACACGATGTACAACAAGA  |
| SS_5        | 15,964,480 | Indel | CACTACATTACTATTG G GAGTAG  | CAGAGGCTACTATTGCTCACTCTAT  |
| SS_6        | 16,024,640 | Indel | GTGTAAC TTACGTAATTTCTAACCA | GAAGTCTCAATTTTACGCATATTAC  |
| SS_7        | 16,836,320 | Indel | AAAAAAAAGAGGGGCTATATACAA   | TAATCTGCTGTTCTTCAAAACCAAT  |
| SS_8        | 15,906,480 | Indel | CTTTTGTACGTGGATATATCTGGA   | TAGACACGGCGAATAACAAC TAATA |
| SS_9        | 15981440   | Indel | CAAATATATAAGTTCCA ACTCACGC | TAATGTCAACTCATTATGAACCACG  |
| SS_10       | 15988960   | Indel | CGAAATGATTAGCAAAAGAGCCTTA  | CAAAATAAAATGTACAAGCAGTGGG  |
| SS_11       | 15,997,840 | Indel | GCGGAATTTTCATAGTGATTTTGAG  | GCCCTCTCTCTATCTTTTTTTTC    |

**Table S2.** Primers for qRT-PCR and gene cloning.

|                    | Name                         | Forward primer (5'→3') | Reverse primer (5'→3') |
|--------------------|------------------------------|------------------------|------------------------|
| Gene cloning       | <i>Bch10G006400</i> _CDs1    | GGACAGTTGGACAGGTATCG   | TGGGGAAGAACTCTGTTGAG   |
|                    | <i>Bch10G006400</i> _CDs2    | AGACCCAGTAAGAAATCGTC   | CTGGTCGTACAAAACATCG    |
|                    | <i>Bch10G006400</i> _sanger1 | GACAAGGAACAGTTCTATCA   | TCTCCCACTCTTCCA ACTC   |
|                    | <i>Bch10G006400</i> _sanger2 | ATTACGAGTTGGAAGAGTGG   | CTCGTTGTAATCTGCCTGT    |
|                    | <i>Bch10G006400</i> _sanger3 | TCAAACAACCGCCATG       | GAACAAACCCTAGTTAAATCC  |
| Primers of qRT-PCR | <i>Bch10G006400</i> _qPCR    | AAACAGGCAGATTACAACG    | ATCAGGCACCAAAACAAG     |
|                    | Actin-UBQ                    | CCTTGCCGACTACAACATCC   | GCACTCCTTCTAAGCCTCT    |

**Table S3.** Seed size linkage markers.

|              |                        |                                                                                                                                                                                                       |
|--------------|------------------------|-------------------------------------------------------------------------------------------------------------------------------------------------------------------------------------------------------|
| 314SNP-dCAPS | Locus sequence         | J16:TTCTTG GCTTGAGAGTGGCGCCGCCG <b>TATC</b> GCGCCGTGGGATTGG<br>FJ5:TTCTTG GCTTGAGAGTGGCGCCGCCG <b>TATC</b> CCGCCGTGGGATTGG                                                                            |
|              | Forward primer (5'→3') | TTCTTG GCTTGAGAGTGGCGCCGCCG <b>GATC</b>                                                                                                                                                               |
|              | Reverse primer (5'→3') | GCATGATTATCTTTCTCAGTGGC                                                                                                                                                                               |
|              | Endonuclease           | <i>Bam</i> HI                                                                                                                                                                                         |
|              | Recognition site       | GGATCC                                                                                                                                                                                                |
| 400SNP-dCAPS | Locus sequence         | J16:GTTGATTACTGTTGCATGGCC <b>ACTG</b> AGAAAGATAATCATGCCTCTCTTA<br>FJ5:GTTGATTACTGTTGCATGGCC <b>ACTG</b> AGAAAGATAATCATGCCTCTCTTA<br>17097:GTTGATTACTGTTGCATGGCC <b>ACTG</b> TAGAAAGATAATCATGCCTCTCTTA |
|              |                        | GTTGATTACTGTTGCATGGCC <b>TCT</b>                                                                                                                                                                      |
|              |                        | CTGATGAATTGATATTGTATGGACG                                                                                                                                                                             |
|              | Forward primer (5'→3') |                                                                                                                                                                                                       |
|              | Reverse primer (5'→3') |                                                                                                                                                                                                       |
|              | Endonuclease           | <i>Hpy</i> 188I                                                                                                                                                                                       |
|              | Recognition site       | TCNGA                                                                                                                                                                                                 |
| 551_InDel    | Locus sequence         | J16:CAACATTCAAAAGCTAAAAAT <b>AGA</b> AGAAGCAGAAGCAATATAC<br>FJ5:CAACATTCAAAAGCTAAAAAT <b>AGA</b> AGAAGCAGAAGCAATATACAA<br>1714:CAACATTCAAAAGCTAAAAAT ---AGAAGCAGAAGCAATATACAA                         |
|              |                        |                                                                                                                                                                                                       |
|              |                        |                                                                                                                                                                                                       |

|  |                        |                        |
|--|------------------------|------------------------|
|  | Reverse primer (5'→3') | TAGTAGACCCAGTAAGAAATCG |
|--|------------------------|------------------------|

Note: Tag name prefixes 314, 400, and 551 represent coded location points, red bold represents mismatch, green bold represents variation sites, and - represents deletion.

**Table S4.** Genotyping results of 108 germplasm chieh-qua materials.

| ID | Sample name | SNP _314 | SNP _400 | InDel _551 | Phenotype  | ID | Sample name | SNP _314 | SNP _400 | InDel _551 | Phenotype  |
|----|-------------|----------|----------|------------|------------|----|-------------|----------|----------|------------|------------|
| 1  | 0401        | <b>G</b> | G        | AAG        | Large seed | 55 | 1732        | G        | <b>T</b> | AAG        | Small seed |
| 2  | 0504        | <b>G</b> | G        | AAG        | Large seed | 56 | 1733        | G        | <b>T</b> | AAG        | Small seed |
| 3  | A-2         | <b>G</b> | G        | AAG        | Large seed | 57 | 17046       | G        | <b>T</b> | AAG        | Small seed |
| 4  | B-4         | <b>G</b> | G        | AAG        | Large seed | 58 | 17048       | G        | <b>T</b> | AAG        | Small seed |
| 5  | C-3         | <b>G</b> | G        | AAG        | Large seed | 59 | 17050       | G        | <b>T</b> | AAG        | Small seed |
| 6  | D2          | <b>G</b> | G        | AAG        | Large seed | 60 | 17051       | G        | <b>T</b> | AAG        | Small seed |
| 7  | D21-4       | <b>G</b> | G        | AAG        | Large seed | 61 | SD19        | G        | <b>T</b> | AAG        | Small seed |
| 8  | D3          | <b>G</b> | G        | AAG        | Large seed | 62 | 17097       | G        | <b>T</b> | AAG        | Small seed |
| 9  | D4          | <b>G</b> | G        | AAG        | Large seed | 63 | 18FJ        | G        | <b>T</b> | AAG        | Small seed |
| 10 | D4-1        | <b>G</b> | G        | AAG        | Large seed | 64 | 17010       | G        | <b>T</b> | AAG        | Small seed |
| 11 | D7          | <b>G</b> | G        | AAG        | Large seed | 65 | 17023       | G        | <b>T</b> | AAG        | Small seed |
| 12 | D10         | <b>G</b> | G        | AAG        | Large seed | 66 | 17057       | G        | <b>T</b> | AAG        | Small seed |
| 13 | D16         | <b>G</b> | G        | AAG        | Large seed | 67 | FJ1022      | G        | <b>T</b> | AAG        | Small seed |
| 14 | D19-6       | <b>G</b> | G        | AAG        | Large seed | 68 | 18FJ-2      | G        | <b>T</b> | AAG        | Small seed |
| 15 | D19-20      | <b>G</b> | G        | AAG        | Large seed | 69 | 18FJ14      | G        | <b>T</b> | AAG        | Small seed |
| 16 | D20-7       | <b>G</b> | G        | AAG        | Large seed | 70 | 17087       | G        | <b>T</b> | AAG        | Small seed |
| 17 | F-2         | <b>G</b> | G        | AAG        | Large seed | 71 | 17016       | G        | <b>T</b> | AAG        | Small seed |
| 18 | J1745       | <b>G</b> | G        | AAG        | Large seed | 72 | 17067       | G        | <b>T</b> | AAG        | Small seed |
| 19 | FJ3         | <b>G</b> | G        | AAG        | Large seed | 73 | 1730        | G        | G        | -          | Small seed |
| 20 | Group A     | <b>G</b> | G        | AAG        | Large seed | 74 | 17081       | G        | G        | -          | Small seed |
| 21 | Tai 13      | <b>G</b> | G        | AAG        | Large seed | 75 | 1718        | G        | G        | -          | Small seed |
| 22 | J25         | <b>G</b> | G        | AAG        | Large seed | 76 | 17055       | G        | G        | -          | Small seed |
| 23 | D22-5       | <b>G</b> | G        | AAG        | Large seed | 77 | 17058       | G        | G        | -          | Small seed |
| 24 | D22-3       | <b>G</b> | G        | AAG        | Large seed | 78 | 22-2        | G        | G        | -          | Small seed |
| 25 | D14         | <b>G</b> | G        | AAG        | Large seed | 79 | 19FJ4-1     | G        | G        | -          | Small seed |
| 26 | D22-1       | <b>G</b> | G        | AAG        | Large seed | 80 | 19FJ12      | G        | G        | -          | Small seed |
| 27 | D25-2-1     | <b>G</b> | G        | AAG        | Large seed | 81 | 17083       | G        | G        | -          | Small seed |
| 28 | D21-5       | <b>G</b> | G        | AAG        | Large seed | 82 | 0404        | G        | G        | -          | Small seed |
| 29 | 1517        | <b>C</b> | G        | AAG        | Small seed | 83 | 17076       | G        | G        | -          | Small seed |
| 30 | FD1680      | <b>C</b> | G        | AAG        | Small seed | 84 | 18FJ4       | G        | G        | -          | Small seed |
| 31 | 17029       | <b>C</b> | G        | AAG        | Small seed | 85 | 17002       | G        | G        | -          | Small seed |
| 32 | 17075       | <b>C</b> | G        | AAG        | Small seed | 86 | 17069       | G        | G        | -          | Small seed |
| 33 | 17094       | <b>C</b> | G        | AAG        | Small seed | 87 | 1722        | G        | G        | -          | Small seed |
| 34 | 1735        | <b>C</b> | G        | AAG        | Small seed | 88 | 1709        | G        | G        | -          | Small seed |
| 35 | 17044       | <b>C</b> | G        | AAG        | Small seed | 89 | 18FJ18      | G        | G        | -          | Small seed |
| 36 | 17063       | <b>C</b> | G        | AAG        | Small seed | 90 | 17080       | G        | G        | -          | Small seed |
| 37 | 17011       | <b>C</b> | G        | AAG        | Small seed | 91 | 17054       | G        | G        | -          | Small seed |

|    |          |   |   |     |            |     |          |   |   |   |            |
|----|----------|---|---|-----|------------|-----|----------|---|---|---|------------|
| 38 | 17071    | C | G | AAG | Small seed | 92  | 17038    | G | G | - | Small seed |
| 39 | 18FJ17   | C | G | AAG | Small seed | 93  | 17062    | G | G | - | Small seed |
| 40 | 17041    | C | G | AAG | Small seed | 94  | 1749     | G | G | - | Small seed |
| 41 | 17060    | C | G | AAG | Small seed | 95  | 17079    | G | G | - | Small seed |
| 42 | 17059    | C | G | AAG | Small seed | 96  | 17053    | G | G | - | Small seed |
| 43 | 19FJ2    | C | G | AAG | Small seed | 97  | 17061    | G | G | - | Small seed |
| 44 | 19FJ14-2 | C | G | AAG | Small seed | 98  | 18FJ19   | G | G | - | Small seed |
| 45 | 17032    | C | G | AAG | Small seed | 99  | PJI-3-1  | G | G | - | Small seed |
| 46 | 17031    | C | G | AAG | Small seed | 100 | 17091    | G | G | - | Small seed |
| 47 | 17064    | C | G | AAG | Small seed | 101 | 17096    | G | G | - | Small seed |
| 48 | 17093    | C | G | AAG | Small seed | 102 | 17045    | G | G | - | Small seed |
| 49 | 19FJ5    | C | G | AAG | Small seed | 103 | 1737-1-1 | G | G | - | Small seed |
| 50 | 19FJ26   | C | G | AAG | Small seed | 104 | 1729-1   | G | G | - | Small seed |
| 51 | 17085    | C | G | AAG | Small seed | 105 | 1714     | G | G | - | Small seed |
| 52 | 1708-2   | C | G | AAG | Small seed | 106 | 17084    | G | G | - | Small seed |
| 53 | 19FJ1-1  | G | T | AAG | Small seed | 107 | 19FJ28-2 | G | G | - | Small seed |
| 54 | 19FJ9    | G | T | AAG | Small seed | 108 | 17070    | G | G | - | Small seed |



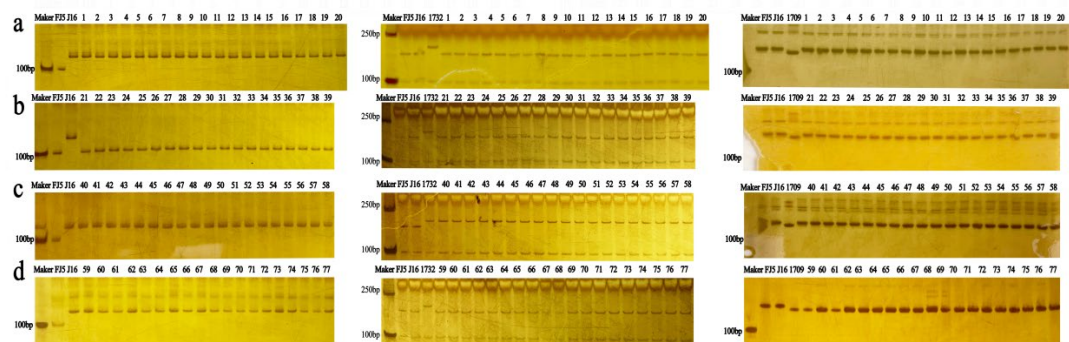

**Figure S2.** Typing results of 3 markers in some materials. (a) The classification results of 20 large materials (G-G-AGA). (b) (c) (d) were the typing results of three haplotypes of small seed materials (C-G-AGA, G-T-AGA and G-G), respectively.

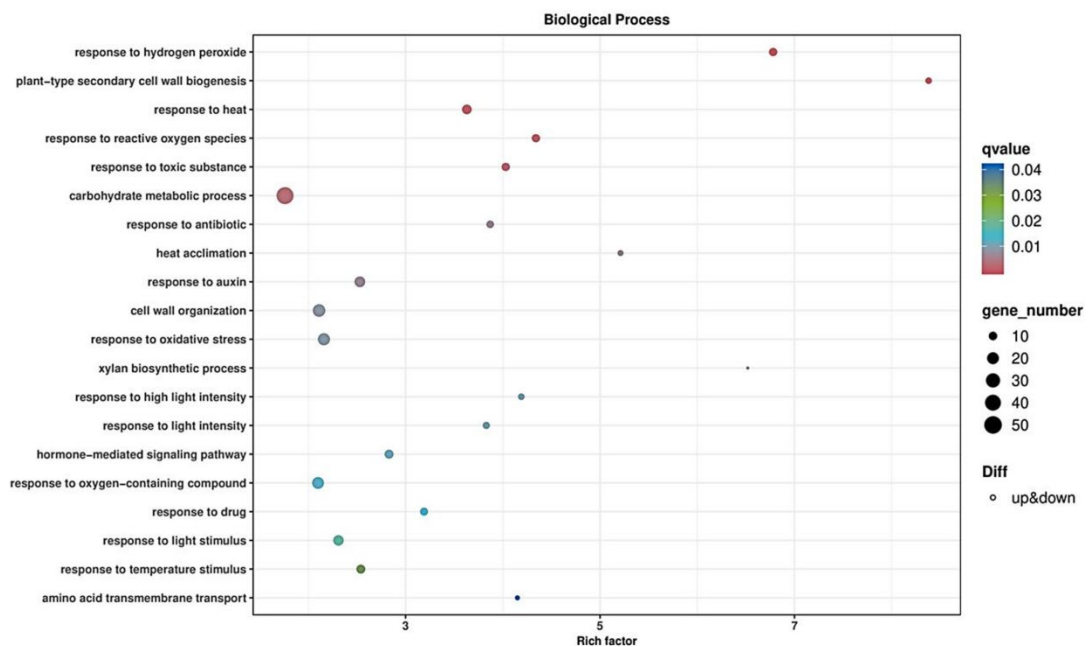

**Figure S3.** GO pathway enrichment on GOs-Bubble chart. **Note:** The horizontal coordinate is GeneRatio, that is, the proportion of the genes of interest in this entry to the number of differentially expressed genes, and the vertical coordinate is each GO comment entry. The size of the dots represents the number of differentially expressed genes annotated in the pathway, and the color of the dots represents the q value of the hypergeometric test.
